# Supplementary material for: Altered morphological dynamics of activated microglia after induction of status epilepticus
Source: PubMed Central journal article supplement (PMC4634193; doi:10.1186/s12974-015-0421-6), 2015-11-04
Supplement: 12974_2015_421_MOESM7_ESM.pdf [file 12974_2015_421_MOESM7_ESM.pdf]

**A**

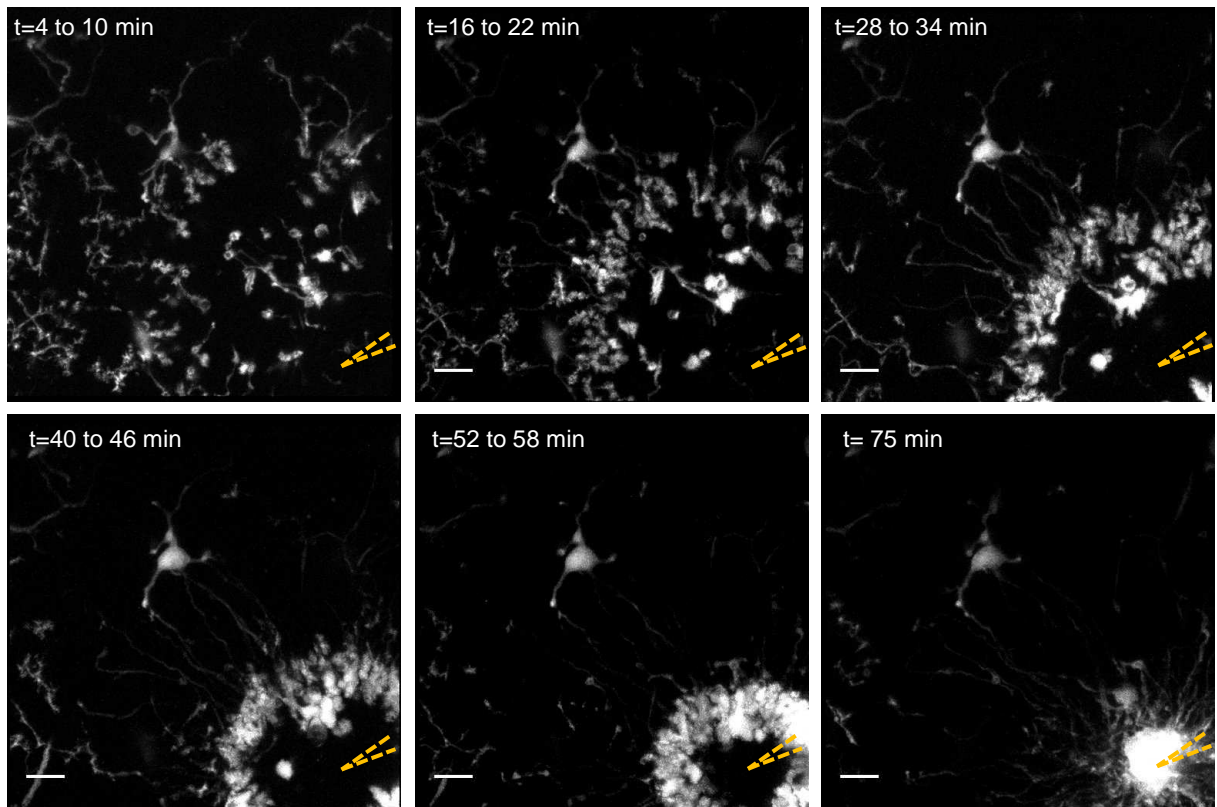

**B**

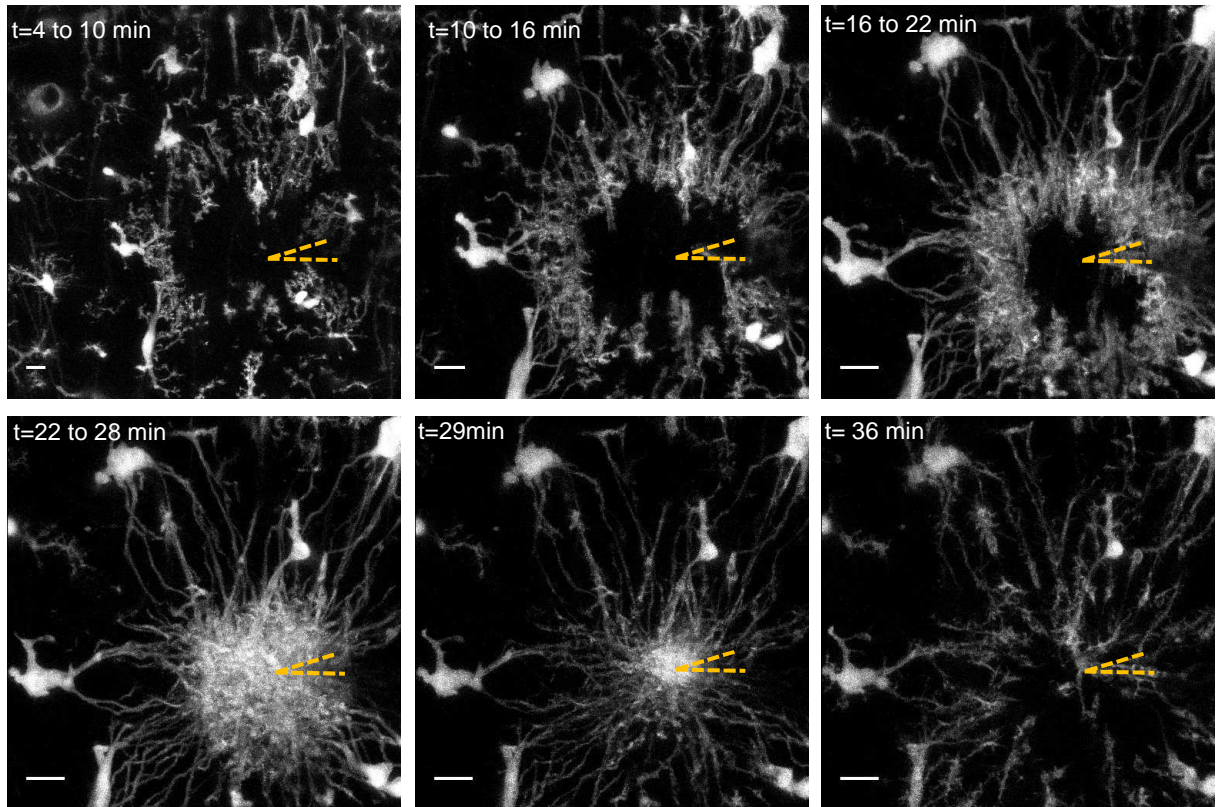

Avignone et al. Supplementary Figure 3
