# Supplementary material for: Altered morphological dynamics of activated microglia after induction of status epilepticus
Source: Springer Nature journal article supplement (doi:10.1186/s12974-015-0421-6), 2015-11-04

**A**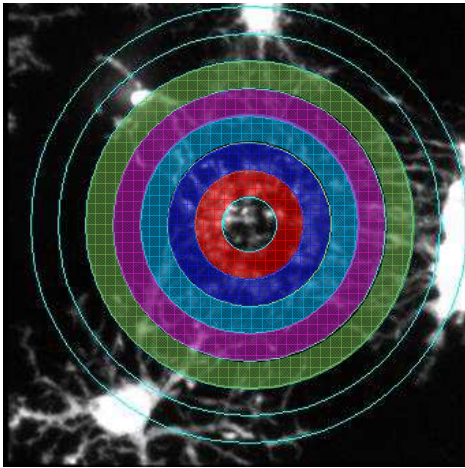**B**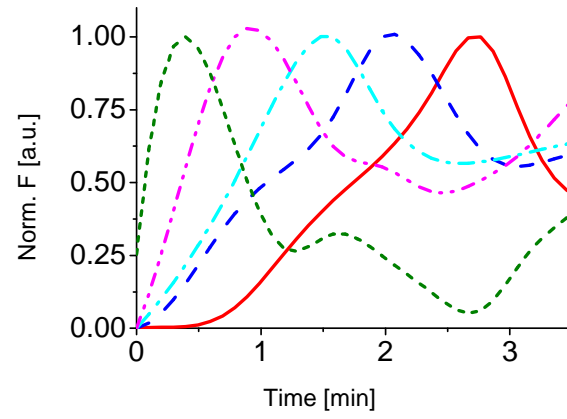

Supplement: MOESM1 [file 9768900]
